# Supplementary material for: Fast-charging aqueous batteries enabled by a three-dimensional ordered Zn anode at deliberate concentration polarization
Source: Royal Society of Chemistry journal article supplement (doi:10.1039/d4cc01798f), 2024-01-01
Supplement: d4cc01798f1.pdf [file d4cc01798f1.pdf]

## Supplementary Information For

### **Fast-charging aqueous batteries enabled by a three-dimensional ordered Zn anode at deliberate concentration polarization**

*Jinze Li,<sup>†a</sup> Eryang Mao,<sup>†b</sup> Xiaozhou Ye,<sup>c</sup> Tian Xu,<sup>d</sup> Jie Zheng,<sup>d</sup> Kaiwen Xiao,<sup>d</sup> Bingbing Sun,<sup>d</sup> Ming Ge,<sup>d</sup> Xiaolei Yu<sup>d</sup> and Zhao Cai<sup>\*a</sup>*

<sup>a</sup> Faculty of Materials Science and Chemistry, China University of Geosciences, Wuhan 430074, China

<sup>b</sup> State Key Laboratory of Catalysis, Dalian National Laboratory for Clean Energy, Dalian Institute of Chemical Physics, Chinese Academy of Sciences, Dalian 116023, China

<sup>c</sup> The Second Research Department, Shanghai Institute of Satellite Engineering, Shanghai 201109, China

<sup>d</sup> School of Chemistry and Chemical Engineering, Nantong University, Nantong 226019, China

<sup>†</sup> These authors contributed equally to this work.

\*E-mail: [caizhao@cug.edu.cn](mailto:caizhao@cug.edu.cn)

## Methods

### Synthesis of the 3DZn@CP electrode

The 3DZn@CP electrode was prepared by an electrodeposition in two-electrode system, where two Zn foils were used as both counter and working electrodes, 1 M ZnSO<sub>4</sub> aqueous solution was employed as electrolyte. The distance between the two Zn electrodes was set as 1 mm. After applying a constant current density of -20 mA cm<sup>-2</sup> for 30 min, the 3DZn@CP electrode was fabricated, which should be washed with deionized water and dried in a vacuum oven before further use.

### Structural Characterizations

The morphology of electrodes was analyzed by a HITACHI SU8010 SEM instrument. XRD measurement was conducted on a Bruker AXS D8 Advance X-ray diffractometer with Cu K $\alpha$  radiation (40 kV, 30 mA). The optical images were obtained by a Canon EOS 5D Mark III Digital SLR.

### Electrochemical Measurements

The electrochemical performance of Zn and 3DZn@CP electrodes was evaluated on a Neware battery tester (BTS, CT-4008) or an electrochemical workstation (VMP3, Biologic). The symmetric cells were assembled using standard CR2025 coin cells, glass fiber separator (WHATMAN, GF/C) and 6 M KOH + 0.2 M Zn(acac)<sub>2</sub> electrolyte. The full cells were assembled using Zn/3DZn@CP anode, glass fiber separator, Ni(OH)<sub>2</sub> cathode, and 6 M KOH + 0.2 M Zn(acac)<sub>2</sub> electrolyte. The Zn electrodes was pre-scanned in 6 M KOH + 0.2 M Zn(acac)<sub>2</sub> for 100 cycles at 40 mV<sup>-1</sup> in order to be activated before full cell performance evaluation (**Figure S14**). The Ni(OH)<sub>2</sub> cathode was prepared using a hydrothermal method: Namely, a piece of Ni foam with a diameter of 9 mm was washed with 3 M HCl, deionized water, and ethanol before transfer to a 50 mL of Teflon-lined autoclave containing 2.5 mmol Ni(NO<sub>3</sub>)<sub>2</sub>·6H<sub>2</sub>O, 25 mmol urea, and 40 mL distilled water. The autoclave was then sealed and heated at 120 °C for 10 h to prepare Ni(OH)<sub>2</sub> cathode. The mass-loading of Ni(OH)<sub>2</sub> on Ni foam was determined to be 2.1 mg cm<sup>-2</sup> by mass weighting before and after deposited procedure. Considering the theoretical capacity of  $\beta$ -Ni(OH)<sub>2</sub> material (**Figure S15**) is 289 mAh g<sup>-1</sup>, the charge-discharge current density of the Ni-Zn batteries was set to be 30.3 mA cm<sup>-2</sup> to ensure the rate of 50 C. CV profiles of the full cells were obtained at a low sweep speed of 1

mV s<sup>-1</sup>. EIS was recorded with frequency range 100 KHz to 0.1 Hz under open circuit voltage with an amplitude of 5 mV. The electrochemical surface area of the Zn and 3DZn@CP electrodes was evaluated by measuring the capacitance of the surface electrical double-layer using Nyquist plots fitted by an equivalent circuit.  $C_{dl}$  was calculated by the Hirschorn-Orazem formula:  $C_{dl} = Q^{1/\alpha} (R_s^{-1} + R_{ct}^{-1})^{(\alpha-1)/\alpha}$ , where  $R_s$  was the solution resistance,  $R_{ct}$  was the charge-transfer resistance,  $Q$  was the constant phase angle parameter,  $\alpha$  was the constant phase angle parameter. CA measurements were conducted at an overpotential of -100 mV. LSV measurements were performed at a low sweep rate of 1 mV s<sup>-1</sup> in a three-electrode system with a saturated calomel electrode as reference electrode and a carbon rod as counter electrode.

### **Theoretical calculation**

The limiting current density was calculated using the Sand's model under the condition that Zn<sup>2+</sup> exhaustion happened at the anode:  $i_L = 2c_b D F / (1 - \rho_+) L$ , where  $c_b$  is the concentration of ZnSO<sub>4</sub> salt in the conducting phase,  $D$  is the diffusion coefficient of Zn ions,  $F$  is the Faraday's constant,  $L$  is the gap distance between the two Zn electrodes (i.e. 1 mm), and  $\rho_+$  is the transference number of Zn<sup>2+</sup> in ZnSO<sub>4</sub> electrolyte.

## Supplementary Figures

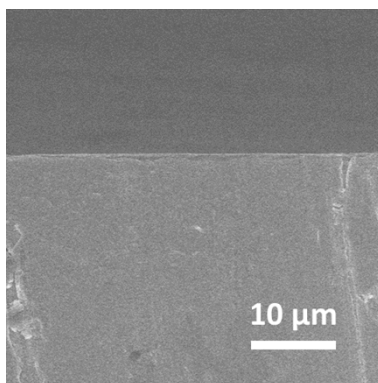

**Figure S1** Cross-section SEM image of commercial Zn foil electrode.

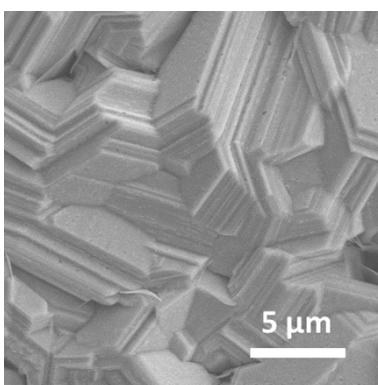

**Figure S2** Top-view SEM image of as-prepared 3DZn@CP electrode.

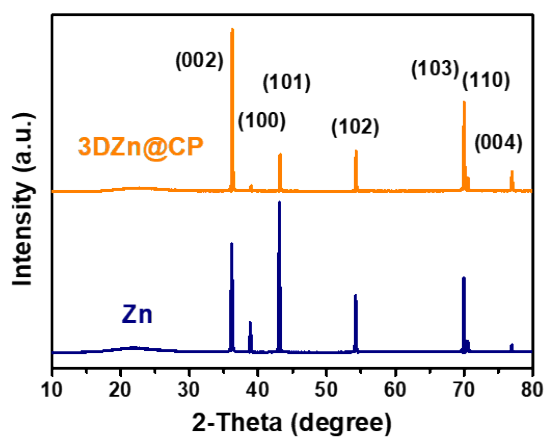

**Figure S3** XRD patterns of commercial Zn and 3DZn@CP electrodes.

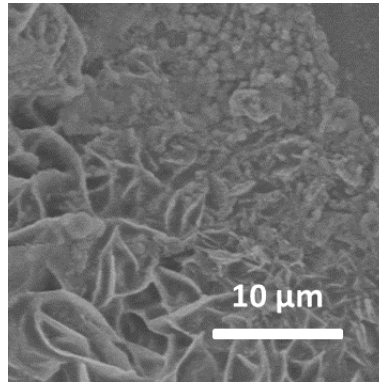

**Figure S4** Top-view SEM image of electrodeposited Zn electrode at  $50 \text{ mA cm}^{-2}$  in  $1 \text{ M ZnSO}_4$  electrolyte.

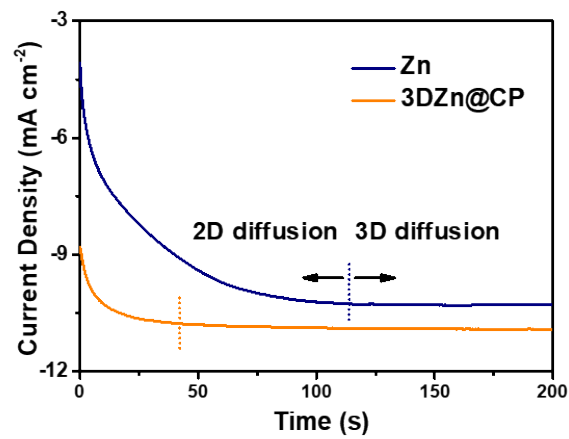

**Figure S5** Chronoamperograms of commercial Zn and 3DZn@CP electrodes.

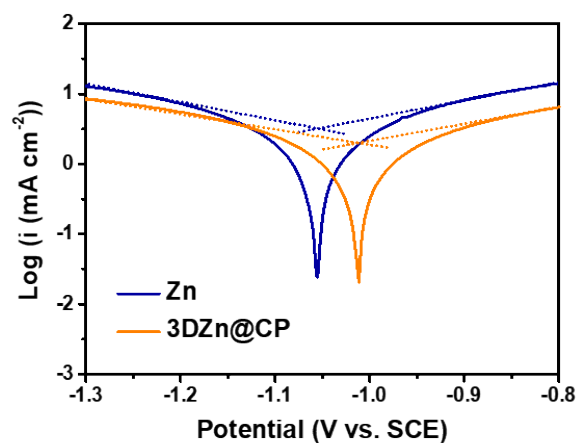

**Figure S6** Corrosion linear polarization curves of commercial Zn and 3DZn@CP electrodes.

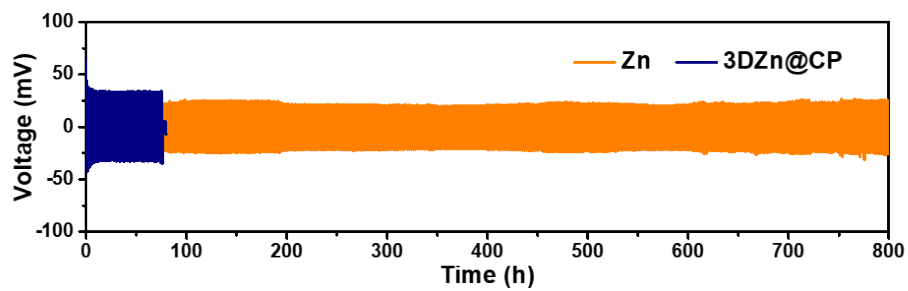

**Figure S7** Voltage profiles of Zn||Zn and 3DZn@CP||3DZn@CP symmetrical cells at 1 mA cm<sup>-2</sup> and 0.5 mAh cm<sup>-2</sup>.

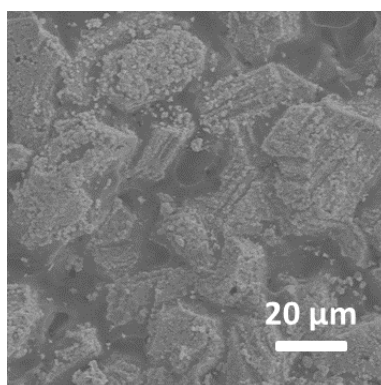

**Figure S8** Top-view SEM image of the 3DZn@CP electrode after plating 10 mAh cm<sup>-2</sup> of metallic Zn at 20 mA cm<sup>-2</sup>.

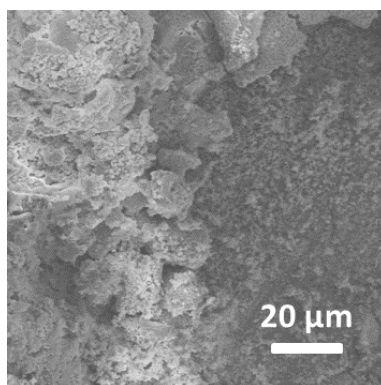

**Figure S9** Top-view SEM image of the commercial Zn electrode after plating 10 mAh cm<sup>-2</sup> of metallic Zn at 20 mA cm<sup>-2</sup>.

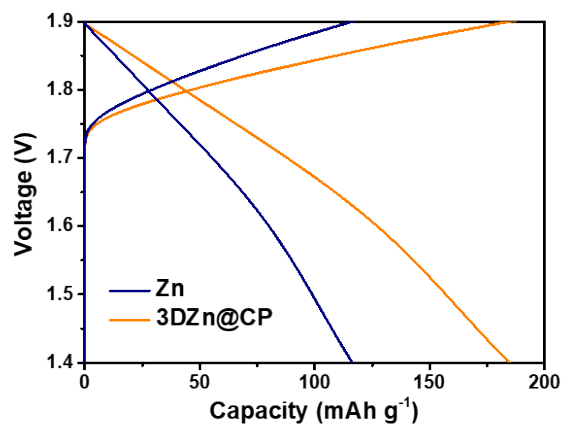

**Figure S10** Charge/discharge curves of the Ni-Zn-based and Ni-3DZn@CP coin cells for the 1<sup>st</sup> cycle.

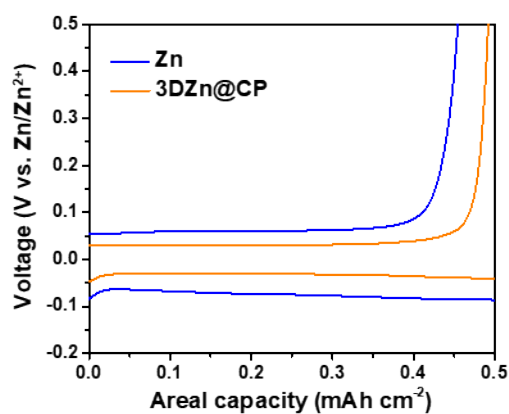

**Figure S11** Electrochemical plating/stripping curves of Zn||Ti and 3DZn@CP||Ti cells at 2 mA cm<sup>-2</sup> and 0.5 mAh cm<sup>-2</sup>.

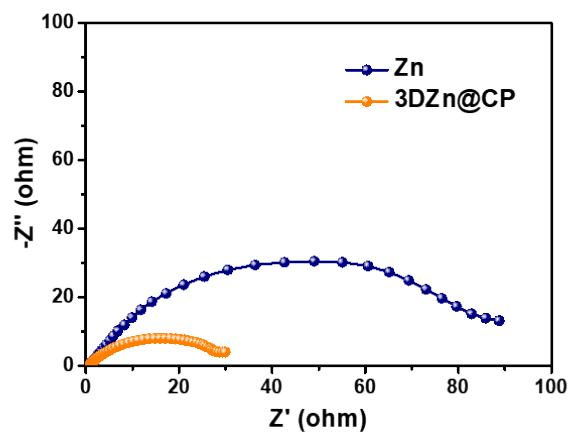

**Figure S12** EIS plots of as-assembled Ni-Zn and Ni-3DZn@CP coin cells.

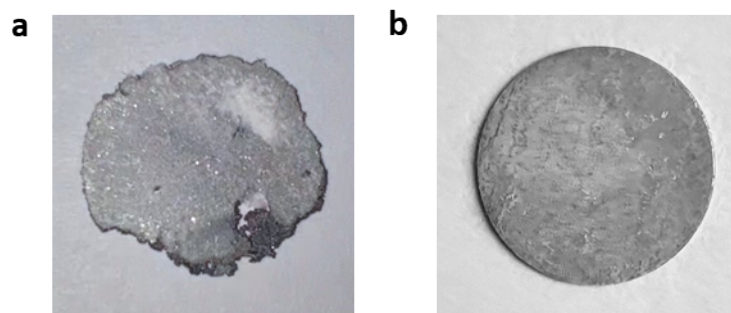

**Figure S13** Digital images of (a) Zn and (b) 3DZn@CP electrodes after Ni-Zn coin cell cycling for 200 cycles at 50 C.

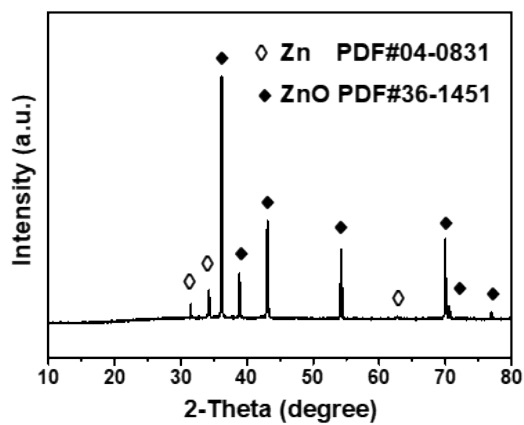

**Figure S14** XRD analysis of the 3DZn@CP electrode after electrochemical activation.

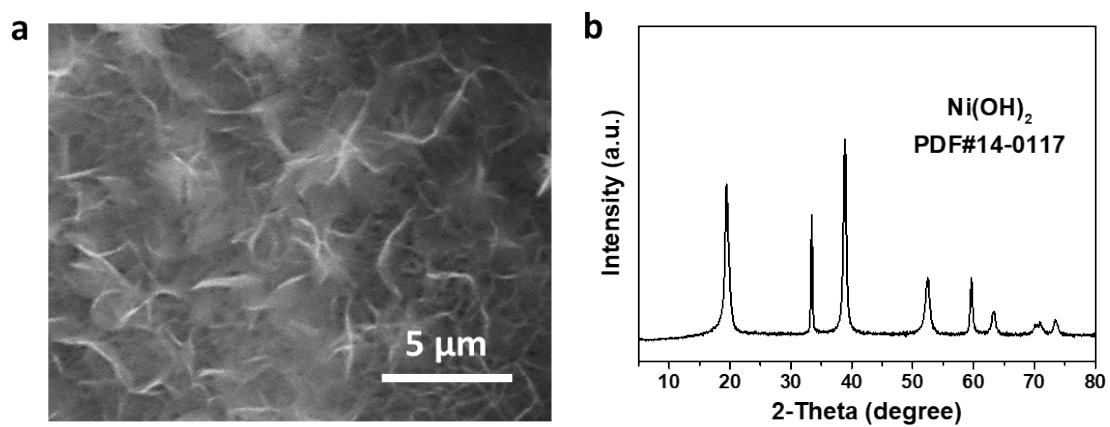

**Figure S15** (a) SEM image and (b) XRD pattern of the as-prepared Ni(OH)<sub>2</sub> cathode materials.



## Supplementary Table

**Table S1** Performance comparison of Ni-3DZn@CP coin cells with those fast-charging aqueous Zn batteries in recent publications.

| Batteries                                                                 | Rates  | Cycle-life | Capacity Retention | Reference                                     |
|---------------------------------------------------------------------------|--------|------------|--------------------|-----------------------------------------------|
| 3DZn@CP  Ni(OH) <sub>2</sub>                                              | 50 C   | 2000       | 97.7%              | This work                                     |
| PA-Zn  MnO <sub>2</sub>                                                   | 2 C    | 1000       | 88.0 %             | Energy Environ. Sci. 2019, 12, 1938-1949.     |
| (CS/CA) <sub>4</sub> -Zn  H <sub>2</sub> V <sub>3</sub> O <sub>8</sub>    | 13.2 C | 14000      | 83.6%              | Adv. Mater. 2024, 36, 2306734.                |
| MPS-Zn  NH <sub>4</sub> V <sub>4</sub> O <sub>10</sub>                    | 7.2 C  | 1000       | 85.2%              | Adv. Funct. Mater., 2024, 2315716.            |
| MXene-Zn  ZnI <sub>2</sub>                                                | 4.7 C  | 1500       | 99.6%              | Adv. Energy Mater. 2024, 2400318.             |
| Cu <sub>5</sub> Zn <sub>8</sub> @NC  V <sub>2</sub> O <sub>5</sub>        | 16.9 C | 10000      | 89.2%              | Adv. Energy Mater. 2024, 2400276.             |
| Zn <sub>3</sub> (PO <sub>4</sub> ) <sub>2</sub> -Zn  MnO <sub>2</sub>     | 3.3 C  | 1000       | 86.2%              | Small, 2024, 2310497.                         |
| Zn  Na <sub>2</sub> V <sub>6</sub> O <sub>16</sub> ·1.63 H <sub>2</sub> O | 1 C    | 2000       | 70%                | Angew. Chem. Int. Ed. 2021, 133, 12546-12553. |
| 3D MXene@Zn  VO <sub>2</sub>                                              | 8.5 C  | 2000       | 77.2%              | J. Mater. Chem. A 2023, 11, 13742-13753.      |
| ZCYSM@Zn  CVO                                                             | 8.5 C  | 5000       | 80.4%              | Adv. Mater. 2023, 35, 2303336.                |
| Zn  NaV <sub>6</sub> O <sub>15</sub> /V <sub>2</sub> O <sub>5</sub>       | 8.5 C  | 3000       | 92.3%              | J. Energy Chem. 2021, 55, 25-33.              |
| Zn  NaKVOH                                                                | 3.4 C  | 1200       | 98.1%              | eScience, 2022, 2, 209-218.                   |
